# Supplementary material
Source: PubMed Central journal article supplement (PMC9728953)

**Supplementary File for**  
**TCF-1 promotes chromatin interactions across topologically associating domains**  
**in T cell progenitors**

Wenliang Wang<sup>1,2,3,4\*</sup>, Aditi Chandra<sup>1,2,3,4\*</sup>, Naomi Goldman<sup>1,2,3,4\*</sup>, Sora Yoon<sup>1,2,3,4\*</sup>, Emily K. Ferrari<sup>1,2,3,4\*</sup>, Son. C. Nguyen<sup>1,3</sup>, Eric F. Joyce<sup>1,3</sup>, and Golnaz Vahedi<sup>1,2,3,4,5#</sup>

<sup>1</sup>Department of Genetics, <sup>2</sup>Institute for Immunology, <sup>3</sup>Epigenetics Institute, <sup>4</sup>Institute for Diabetes, Obesity and Metabolism, <sup>5</sup>Abramson Family Cancer Research Institute, University of Pennsylvania Perelman School of Medicine, Philadelphia, PA 19104, USA

\*These authors contributed equally

#Corresponding author: [vahedi@penncellmedicine.upenn.edu](mailto:vahedi@penncellmedicine.upenn.edu)

421 Curie Blvd, Room 314

Philadelphia, PA 19104-6160

Phone: Office (215) 898-8439

### **Supplementary Figure 1**

**a-e.** ChIP-seq and RNA-seq measurements were performed in two biological replicates in NIH3T3. Pearson correlation was calculated for biological replicates.

### **Supplementary Figure 2**

**a-f.** ChIP-seq measurements for TCF-1, SMC1, and CTCF were performed in DN3s two biological replicates which demonstrated significant degree of reproducibility. Pearson correlation was used to calculate correlation across replicates.

### **Supplementary Figure 3**

**a-f.** ChIP-seq measurements for H3K27ac, NIPBL and RNA-seq were performed in DN3s two biological replicates which demonstrated significant degree of reproducibility. Pearson correlation was used to calculate correlation across replicates.

Supplementary Fig. 1

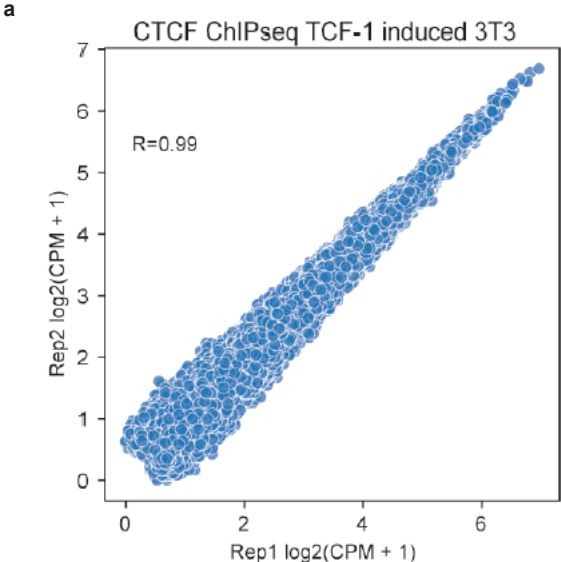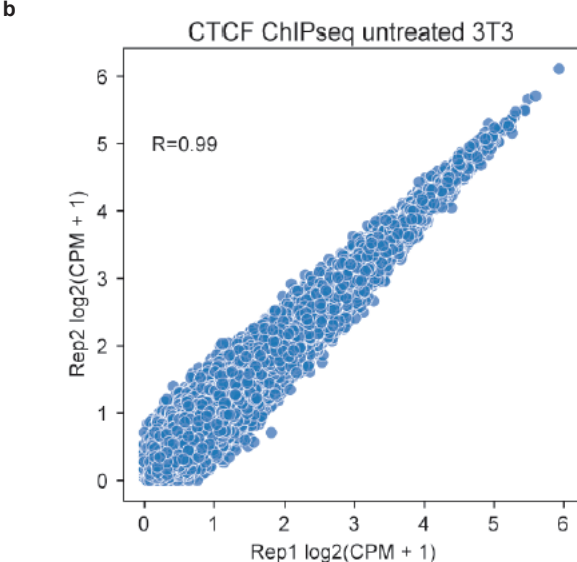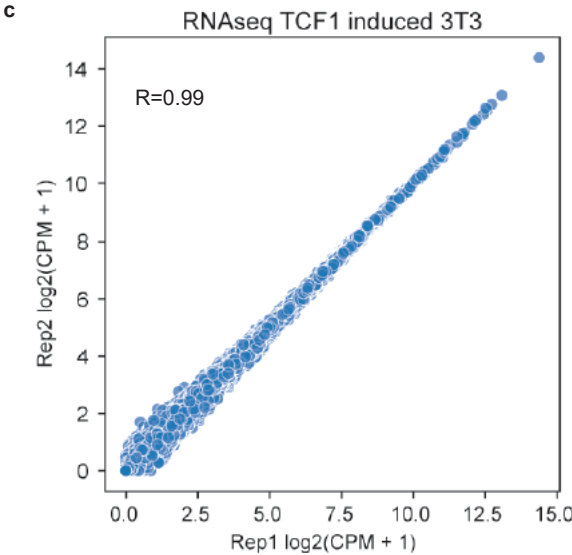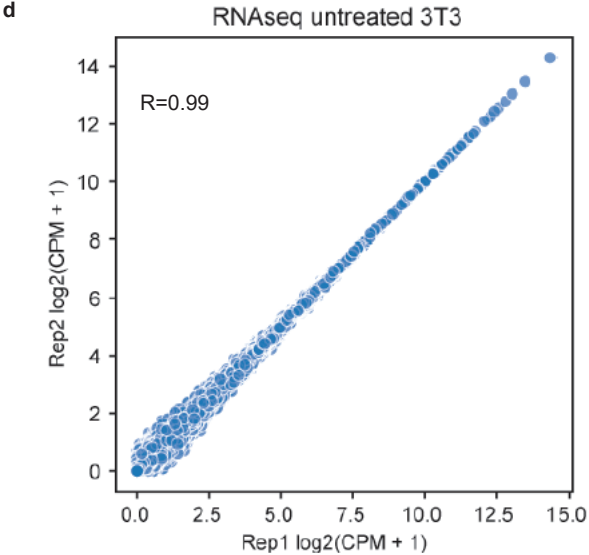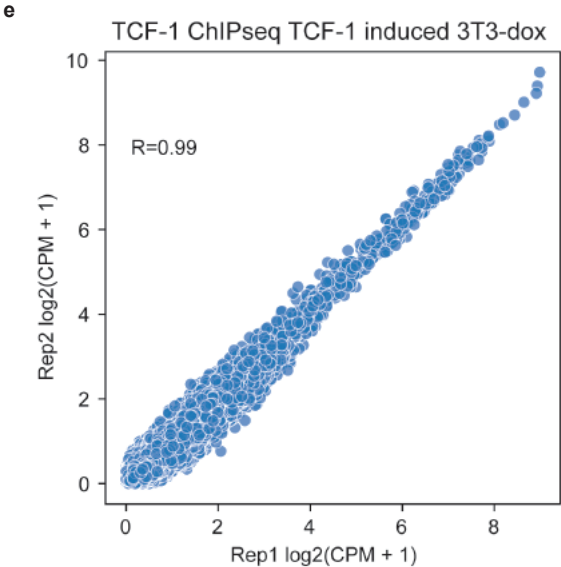

## Supplementary Fig. 2

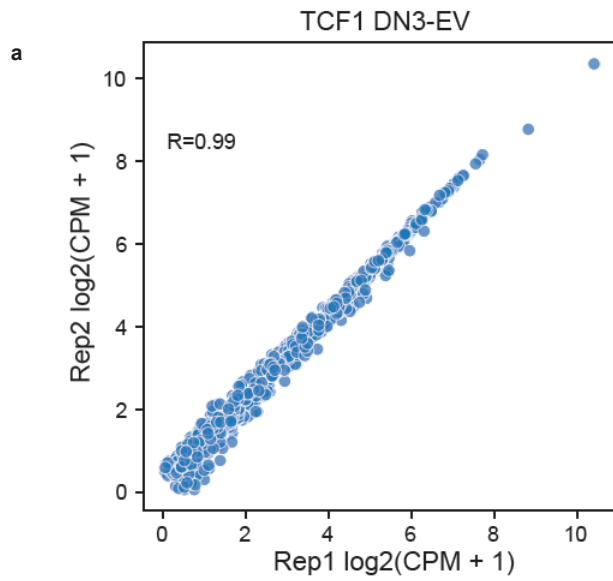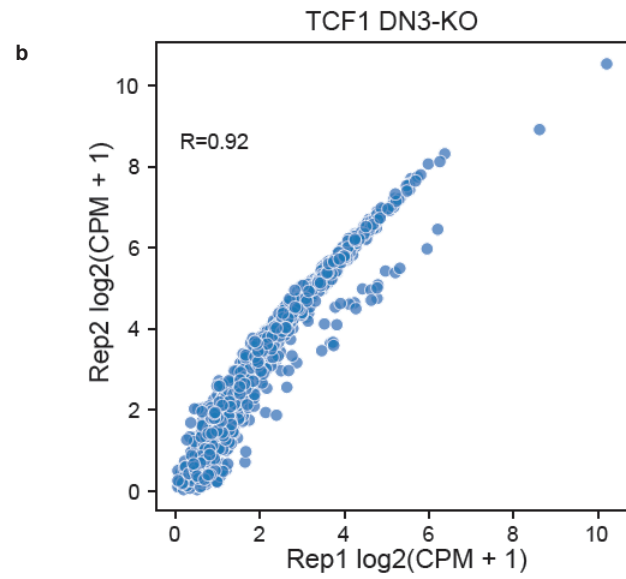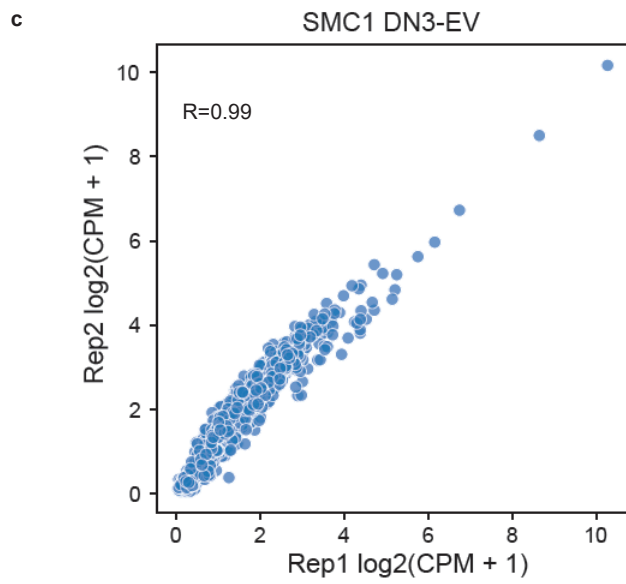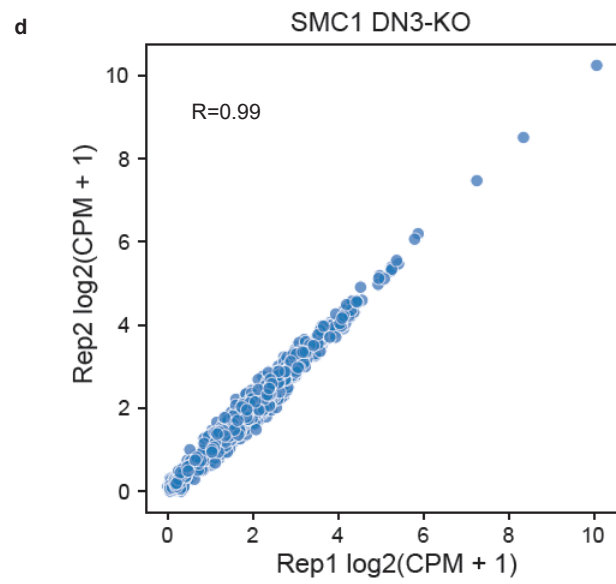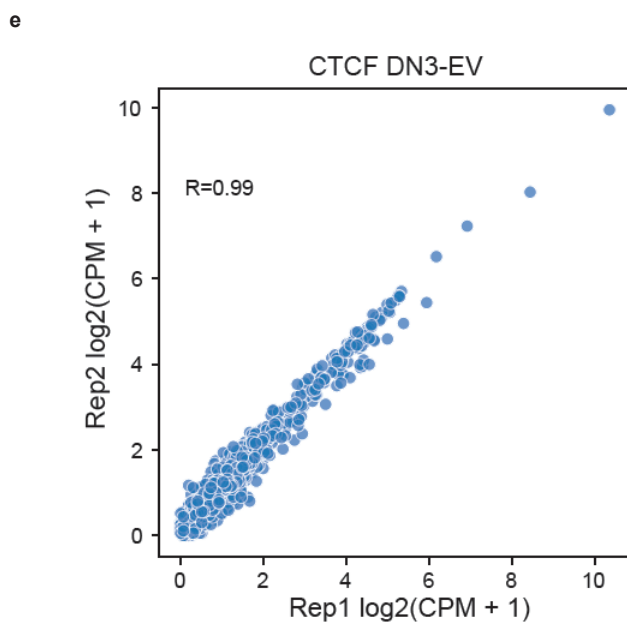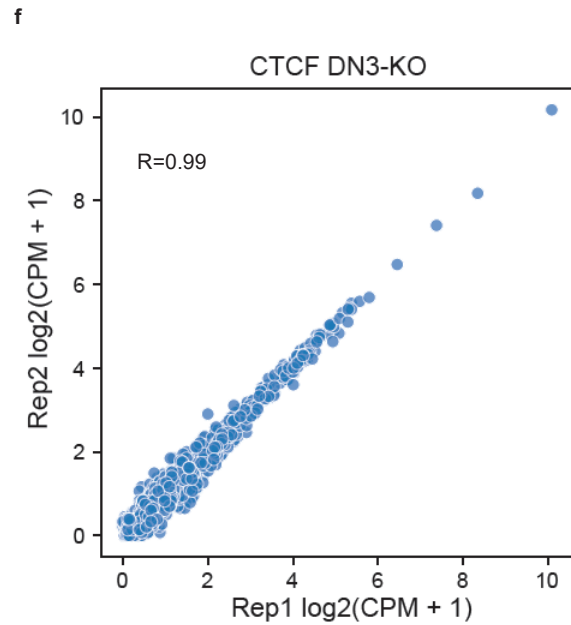

Supplementary Fig. 3

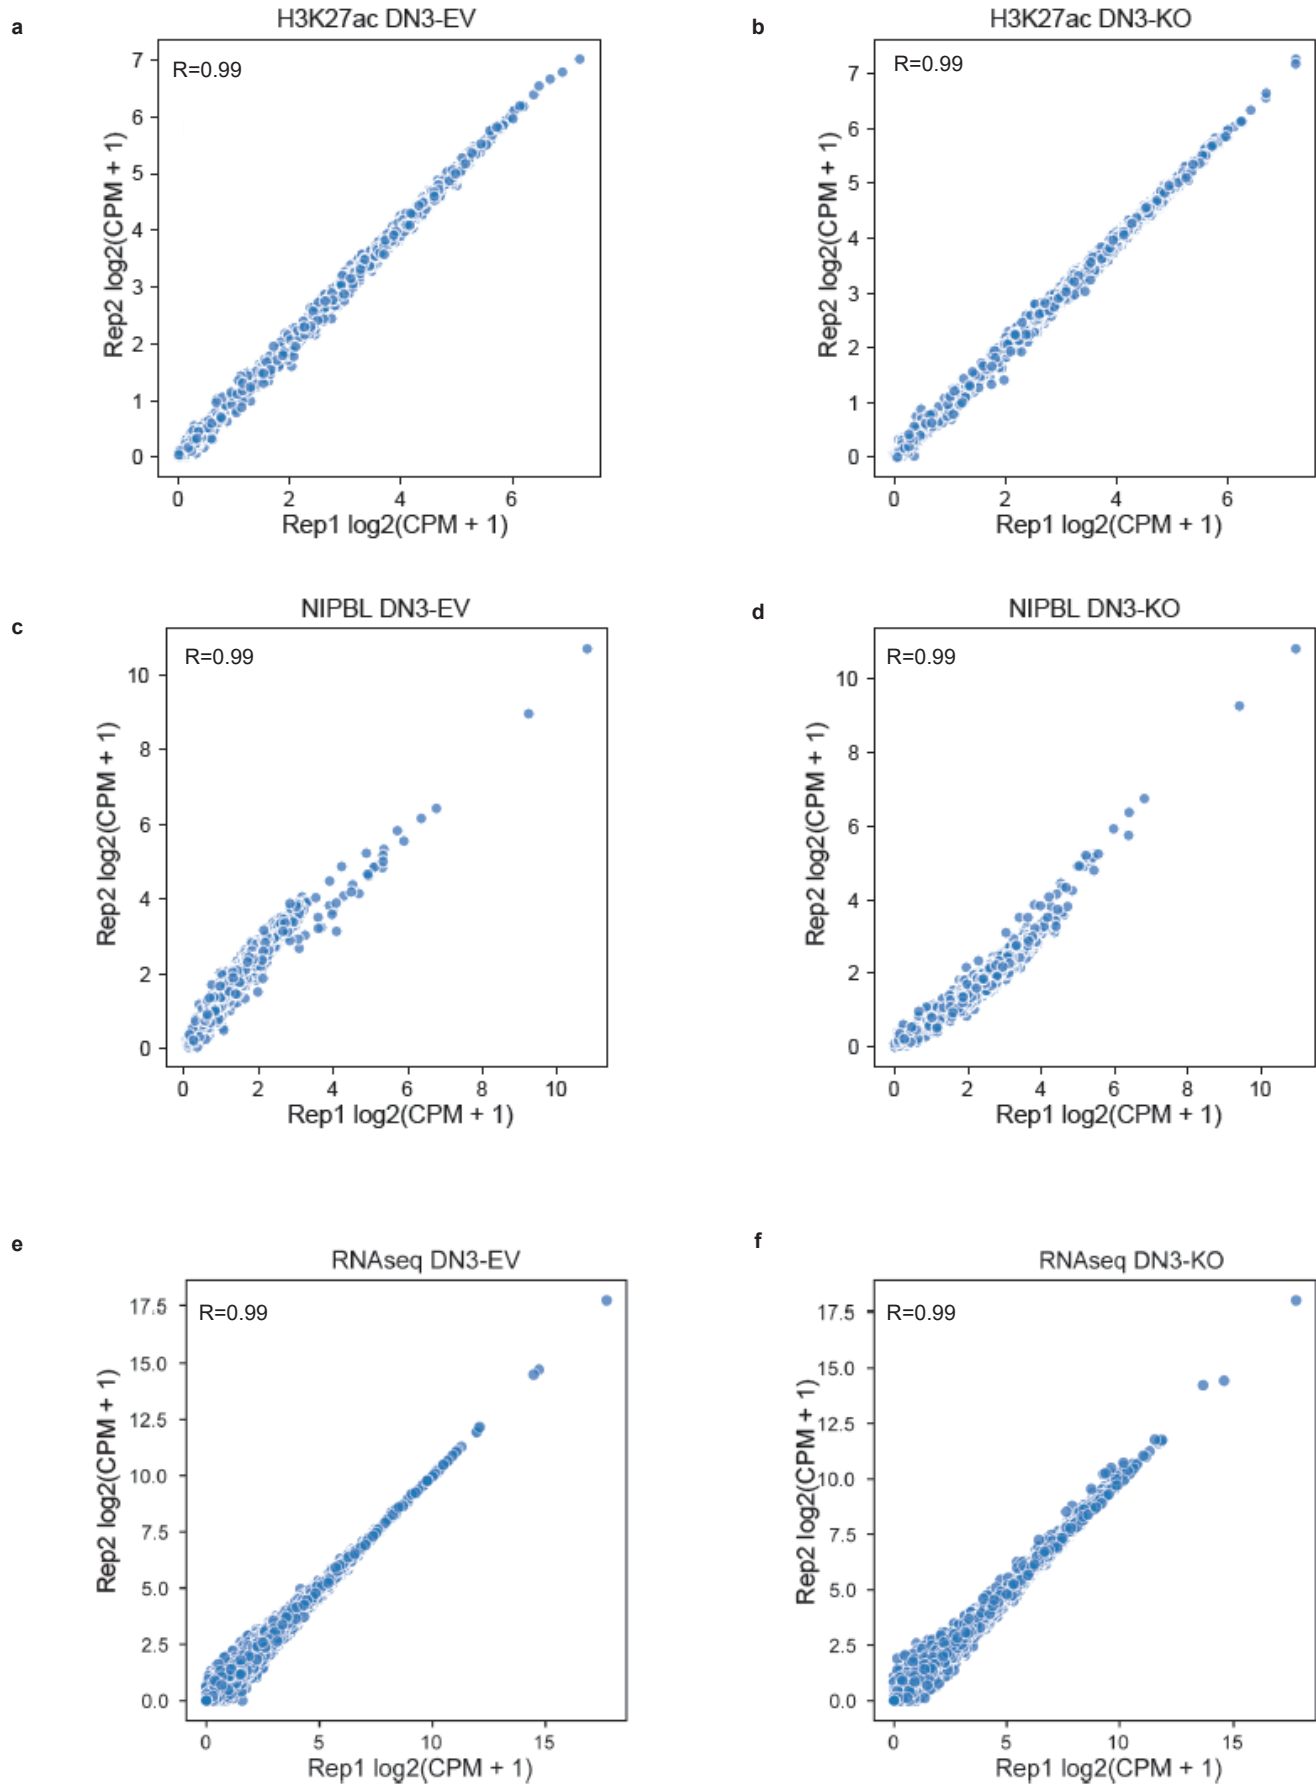

Supplement: NIHMS1845873-supplement-Supplementary_Figures_1-3.pdf [file NIHMS1845873-supplement-Supplementary_Figures_1-3.pdf]
